# Supplementary material
Source: PubMed Central journal article supplement (PMC8250795)
Supplement: JGS-69-1147-s001.pdf [file JGS-69-1147-s001.pdf]

1 **Supplemental File:** Worries, Attitudes, and Mental Health of Older Adults during  
2 the COVID-19 pandemic: Canadian and US Perspectives

3

4 **Supplementary Text S1: Additional Methodology Details**

5 The survey completion rate was calculated as the number of respondents who  
6 finished the survey divided by the number of respondents who consented to  
7 participate. For US data we excluded surveys with >65% missing data. For Canadian  
8 data we excluded surveys if age was missing, if respondents were younger than 55,  
9 or if respondents did not go beyond providing demographic information. IP  
10 addresses were removed if they were outside the US or Canada. Missing data was  
11 defined differently due to the fact that the Research Ethics Board (REB) in Canada  
12 did not allow for mandatory questions, whereas the US Institutional Review Board  
13 (IRB) permitted mandatory age and demographic questions in order to complete  
14 the survey. We used adaptive questioning for certain items (i.e. some questions  
15 conditionally displayed based on earlier responses) to reduce the number and  
16 complexity of the questions. Qualtrics software did not allow for completeness  
17 checks prior survey submission and there were very few mandatory items due to  
18 REB specifications. Respondents were able to review and change their answers  
19 through the back button before submitting the survey.

20

21 The 5-point Likert-type questions to assess COVID-19 perceptions and attitudes  
22 towards government response were developed by authors at the University of  
23 Michigan in consultation with survey methodologists at the Survey Research Center,

24 University of Michigan Institute for Social Research. These questions had response  
25 options that were based on the most commonly used Likert scales asking  
26 respondents to indicate their degree of agreement with a declarative statement.<sup>1</sup>  
27 The questions asked “To what extent do you agree or disagree with the following  
28 statements? [strongly agree, agree, neither agree nor disagree, disagree, strongly  
29 disagree]”. The eight-item CES-D has been used in the US Health and Retirement  
30 Study and has high internal consistency and reliability<sup>2,3</sup>. We used a score  $\geq 3$  to  
31 define elevated depressive symptoms, which was determined to be similar to the cut  
32 point of  $\geq 16$  on the full CES-D<sup>3</sup> and has been used in prior research with older  
33 adults<sup>4</sup>. The 5-item BAI has been used in other studies of older adults with good  
34 internal consistency<sup>5</sup>. We defined elevated anxiety as scores  $\geq 10$  on the 5-item BAI,  
35 corresponding to the highest quartile of the distribution in our sample, which is a  
36 similar justification of cut-off scores used by Gould et al.<sup>6</sup> Loneliness was measured  
37 using the 3-item UCLA-loneliness scale, a validated, self-rated tool with illustrated  
38 reliability and correlation to the full 20-item revised UCLA loneliness scale<sup>7</sup>. A total  
39 score of  $\geq 6$  was considered lonely, similar to other epidemiologic studies of older  
40 adults<sup>8,9</sup>. All three mental health scales had good internal consistency, with  
41 Chronbach’s alpha of 0.82 (both US and Canada) for the 8-item CES-D, 0.75 (US) and  
42 0.76 (Canada) for the 5-item BAI, and 0.77 (US) and 0.78 (Canada) for the 3-item  
43 UCLA loneliness scale.

44

45

46

Supplementary Figure S1: Recruitment flow chart

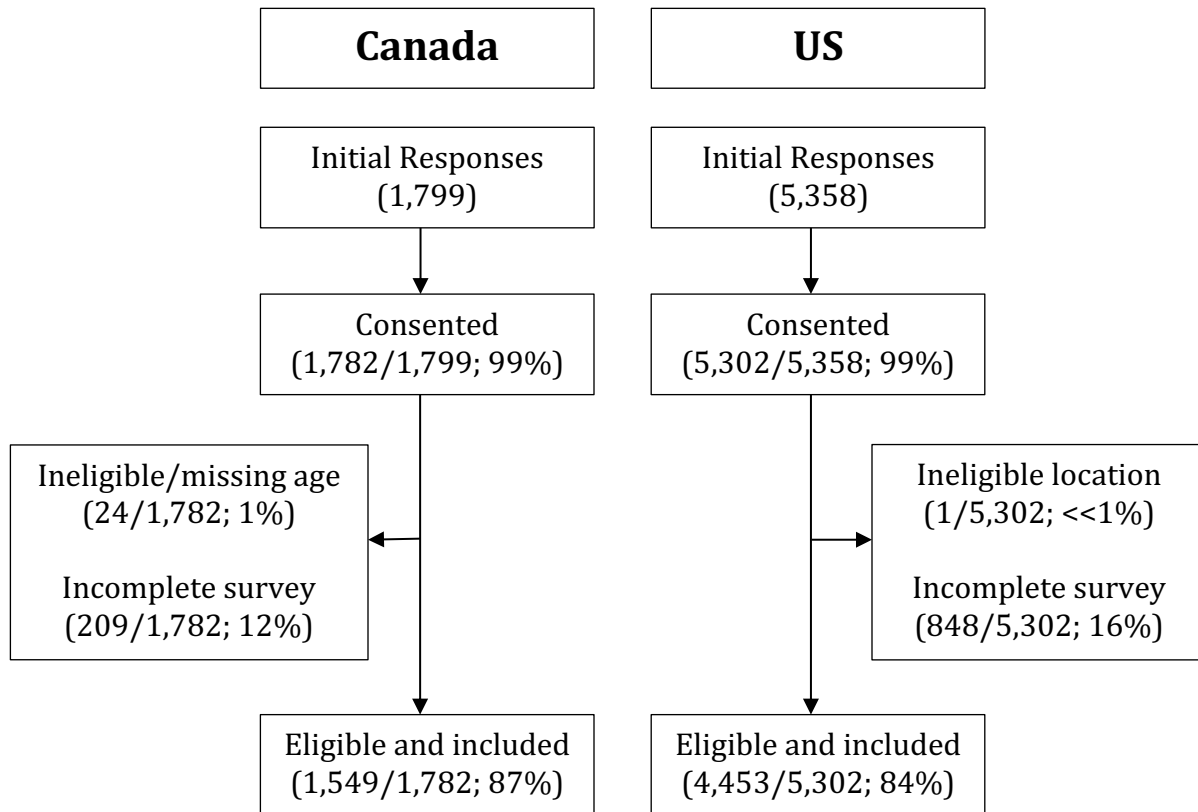

REFERENCES

1. Survey Research Methods (4th ed.). 4th ed. Thousand Oaks, California 2009.
2. Hann D, Winter K, Jacobsen P. Measurement of depressive symptoms in cancer patients: evaluation of the Center for Epidemiological Studies Depression Scale (CES-D). *J Psychosom Res.* 1999;46(5):437-443.
3. Steffick D. *Documentation of affective functioning measures in the Health and Retirement Study (HRS/AHEAD Documentation Report No. DR-005)* Available at <http://www.umich.edu/~hrswww/docs/userg/index.html>. Ann Arbor, MI: University of Michigan Survey Research Center; 2000.
4. Kobayashi LC, Steptoe A. Social Isolation, Loneliness, and Health Behaviors at Older Ages: Longitudinal Cohort Study. *Annals of behavioral medicine : a publication of the Society of Behavioral Medicine.* 2018;52(7):582-593.
5. Gould CE, O'Hara R, Goldstein MK et al. Multimorbidity is associated with anxiety in older adults in the Health and Retirement Study. *Int J Geriatr Psychiatry.* 2016;31(10):1105-1115.
6. Gould CE, Rideaux T, Spira AP et al. Depression and anxiety symptoms in male veterans and non-veterans: the Health and Retirement Study. *Int J Geriatr Psychiatry.* 2015;30(6):623-630.

- 80 7. Hughes ME, Waite LJ, Hawkey LC et al. A Short Scale for Measuring  
81 Loneliness in Large Surveys: Results From Two Population-Based Studies.  
82 Res Aging. 2004;26(6):655-672.
- 83 8. Steptoe A, Shankar A, Demakakos P et al. Social isolation, loneliness, and all-  
84 cause mortality in older men and women. Proc Natl Acad Sci U S A.  
85 2013;110(15):5797-5801.
- 86 9. Perissinotto CM, Stijacic Cenzer I, Covinsky KE. Loneliness in older persons: a  
87 predictor of functional decline and death. Arch Intern Med.  
88 2012;172(14):1078-1083.
- 89  
90
